# Supplementary material for: Recent inorganic carbon increase in a temperate estuary driven by water quality improvement and enhanced by droughts
Source: Copernicus journal article supplement (doi:10.5194/bg-20-4931-2023), 2023-12-14
Supplement: Supplementary file 1 [file bg-20-4931-2023-supplement.pdf]

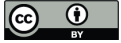

*Supplement of*

## **Recent inorganic carbon increase in a temperate estuary driven by water quality improvement and enhanced by droughts**

**Louise C. V. Rewrie et al.**

*Correspondence to:* Louise C. V. Rewrie ([louise.rewrie@hereon.de](mailto:louise.rewrie@hereon.de)) and Yoana G. Voynova ([yoana.voynova@hereon.de](mailto:yoana.voynova@hereon.de))

The copyright of individual parts of the supplement might differ from the article licence.

## Recent inorganic carbon increase in a temperate estuary driven by water quality improvement and enhanced by droughts

### Ecosystem parameters

The analytical measurement methods for the ecosystem parameters with the respective German Institute for Standardisation methods are listed in Table S1. Since 1997, specifications were reported and available (since 2004) on the International Commission for the Protection of the Elbe River website (IKSE, [www.iksemkol.org](http://www.iksemkol.org)). The FGG Elbe acquired surface water samples from 36 stations in the estuary by helicopter at ebb current (ARGE Elbe, 2000), and sampling was generally completed in February, May, June, July, August and November (see Rewrie et al. (in review) for a detailed description on the FGG Elbe sample collection program and methods). However, in some years there were exceptions. Instead of February, January 2020 and March 2009-2011 were sampled. Instead of November, December 1998-2019 were sampled. In 2010, samples were collected on 01.06.2010 and 30.06.2010, and the latter was used to represent July 2010.

DIC concentrations were derived during the analysis of dissolved organic carbon (DOC). Rewrie et al. (in review) provides an extensive overview on the FGG Elbe DIC measurements used in this study, and comparisons to other conventional DIC methods of analysis. To determine particulate organic carbon (POC), the difference between TOC and DOC was calculated, with an estimated uncertainty of 20% (Wiegel, pers. comm). See description of the organic carbon method in Table S1, along with methods for DIC, TOC, DOC, dissolved oxygen (DO), pH, BOD<sub>7</sub>.

Table S1. Methods for determination of ecosystem parameters included in the present study. Analyses were conducted according to the German industry standards (DIN).

| Parameter        | Description                                                                     | Units                             | DIN                               | Significant digits/<br>indication of results |
|------------------|---------------------------------------------------------------------------------|-----------------------------------|-----------------------------------|----------------------------------------------|
| Conductivity     | Platinum probe                                                                  | mS m <sup>-1</sup>                | DIN EN 27888-C8                   | 3/0.1                                        |
| Temperature      | Resistance thermometer                                                          | °C                                | DIN 38404-C4-2                    | 2/0.1                                        |
| DO               | Oxygen membrane probe                                                           | mg L <sup>-1</sup>                | DIN EN 25814-G22                  | 2/0.1                                        |
| pH               | Potentiometrically with glass electrode                                         |                                   | DIN 38404-C5                      | 2/0.1                                        |
| TOC, DOC, DIC    | Catalytic high-temperature oxidation, CO <sub>2</sub> detection via IR detector | mg L <sup>-1</sup>                | DIN 38409-H3-1,<br>DIN EN 1484-H3 | 2/0.1<br>1/1                                 |
| BOD <sub>7</sub> | Oxygen probe                                                                    | mg O <sub>2</sub> L <sup>-1</sup> | DIN EN 1899-2 (H52)               |                                              |
| SPM              | Vacuum Filtration on Glass fiber filter (Whatman GF/F, 0.45µm)                  | mg L <sup>-1</sup>                | DIN 38409-H2-3                    | 2/1                                          |

### Uncertainty for pCO<sub>2</sub> and TA

The median of the calculated uncertainty output from the CO<sub>2</sub>SYST program for pCO<sub>2</sub> was 209 µatm (18% uncertainty relative to the mean pCO<sub>2</sub>) and for TA was 100 µmol kg<sup>-1</sup> (5% uncertainty relative to the mean TA) in the Elbe Estuary (z1-z7) between 1997 and 2020 (Table S2).

Table S2. The mean (± standard deviation, σ) and median of the combined standard uncertainty (u<sub>c</sub>) for pCO<sub>2</sub> in µatm and TA in µmol kg<sup>-1</sup> in zones 1-7

| Parameter        | u <sub>c</sub> mean (± σ) | u <sub>c</sub> median |
|------------------|---------------------------|-----------------------|
| pCO <sub>2</sub> | 268 ± 205                 | 209                   |
| TA               | 109 ± 28                  | 100                   |

Comparing calculated TA and pCO<sub>2</sub> with respective uncertainty output and measured TA and calculated pCO<sub>2</sub> by Amann et al. (2015) between 2009 and 2011 we find a good fit between the datasets, with an example of August 2010 shown in Fig. S1 for the Elbe Estuary.

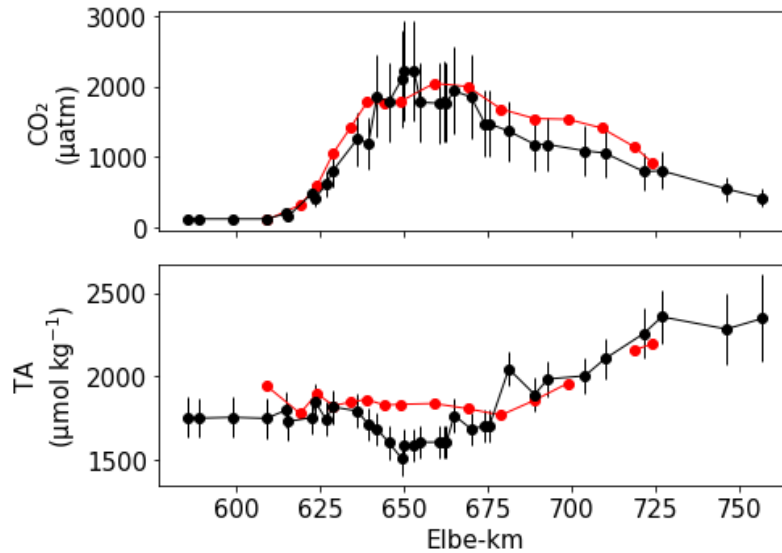

Fig. S1. Calculated  $p\text{CO}_2$  and TA (black) with the uncertainty as error bars in August 2010. Calculated  $p\text{CO}_2$  and measured TA (red) from Amann et al. (2015) in August 2010.

To compare calculated TA and  $p\text{CO}_2$  with measured TA and calculated  $p\text{CO}_2$  in Norbistrath et al. (2022), the mean of TA and  $p\text{CO}_2$  in the Elbe Estuary was calculated in regions assigned by Norbistrath et al. (2022) for June 2019 (Table S3). To account for the respective uncertainty for each calculated TA and  $p\text{CO}_2$  measurement the pooled uncertainty ( $P_u$ ) was calculated, assuming equal sample size between each calculated measurement:

$$P_u = \sqrt{\frac{u_1^2 + u_2^2 + \dots + u_k^2}{k}}, \quad (\text{S2})$$

Where  $u$  is the uncertainty given for each calculated measurement and  $k$  is the number of samples in each group.

Table S3. The mean ( $\pm$  standard deviation ( $\sigma$ )) for measured TA in  $\mu\text{mol kg}^{-1}$  and calculated  $p\text{CO}_2$  in  $\mu\text{atm}$  from Norbistrath et al. (2022) in June 2019. The mean and the pooled uncertainty ( $P_u$ ) for calculated TA in  $\mu\text{mol kg}^{-1}$  and  $p\text{CO}_2$  in  $\mu\text{atm}$  from the present study (Rewrie et al.) in June 2019.

| Box (Elbe km)                        | Norbistrath et al. (2022)      |                                    | Rewrie et al.                  |       |                                    |       |
|--------------------------------------|--------------------------------|------------------------------------|--------------------------------|-------|------------------------------------|-------|
|                                      | TA ( $\mu\text{mol kg}^{-1}$ ) | $p\text{CO}_2$ ( $\mu\text{atm}$ ) | TA ( $\mu\text{mol kg}^{-1}$ ) |       | $p\text{CO}_2$ ( $\mu\text{atm}$ ) |       |
|                                      |                                |                                    | Mean                           | $P_u$ | Mean                               | $P_u$ |
| 1 (586-620)                          | $1289 \pm 8$                   | $465 \pm 341$                      | 1667                           | 103   | 575                                | 207   |
| 2 (621-640)                          | $1512 \pm 40$                  | $2074 \pm 488$                     | 1587                           | 99    | 2178                               | 704   |
| 3 (641-665)                          | $1630 \pm 42$                  | $1833 \pm 120$                     | 1668                           | 99    | 1811                               | 558   |
| 4 (666-695)                          | $1733 \pm 35$                  | $1554 \pm 210$                     | 1817                           | 101   | 1130                               | 313   |
| 5 (696-712)                          | $1879 \pm 21$                  | $713 \pm 208$                      | 1897                           | 114   | 830                                | 249   |
| 6 (713 - outer region (approx. 757)) | Max 2449                       |                                    | 2222                           | 189   |                                    |       |

#### Air-water $\text{CO}_2$ exchange

To compare calculated air-water  $\text{CO}_2$  flux estimates with previously calculated air-water  $\text{CO}_2$  flux estimates in Norbistrath et al. (2022), the mean air-water  $\text{CO}_2$  flux in the Elbe Estuary was calculated in regions assigned by Norbistrath et al. (2022) for June 2019. We find a good fit with air-water  $\text{CO}_2$  flux estimates to those calculated in Norbistrath et al. (2022) shown in Table S4.

Table S4. Mean ( $\pm$  standard deviation) air-water  $\text{CO}_2$  flux estimates in  $\text{mmol m}^{-2} \text{d}^{-1}$  for June 2019 in the Elbe Estuary calculated by Norbistrath et al. (2022) and in this study (Rewrie et al.). The regions (Box 1-5) were defined in Norbistrath et al. (2022).

| Box (Elbe km) | Norbistrath et al. (2022)<br>air-water $\text{CO}_2$ flux estimates<br>( $\text{mmol C m}^{-2} \text{d}^{-1}$ ) | Rewrie et al.<br>air-water $\text{CO}_2$ flux estimates<br>( $\text{mmol C m}^{-2} \text{d}^{-1}$ ) |
|---------------|-----------------------------------------------------------------------------------------------------------------|-----------------------------------------------------------------------------------------------------|
|---------------|-----------------------------------------------------------------------------------------------------------------|-----------------------------------------------------------------------------------------------------|

|             |             |             |
|-------------|-------------|-------------|
| 1 (586-620) | $2 \pm 14$  | $7 \pm 12$  |
| 2 (621-640) | $68 \pm 22$ | $79 \pm 13$ |
| 3 (641-665) | $59 \pm 5$  | $67 \pm 13$ |
| 4 (666-695) | $38 \pm 11$ | $40 \pm 8$  |
| 5 (696-712) | $9 \pm 6$   | $28 \pm 12$ |

### Chlorophyll a in the upper Elbe Estuary

The monthly mean chlorophyll a concentration in the upper Elbe Estuary at station 585.5 Elbe-km based on data between 1997 and 2020 was quantified (Fig. S2).

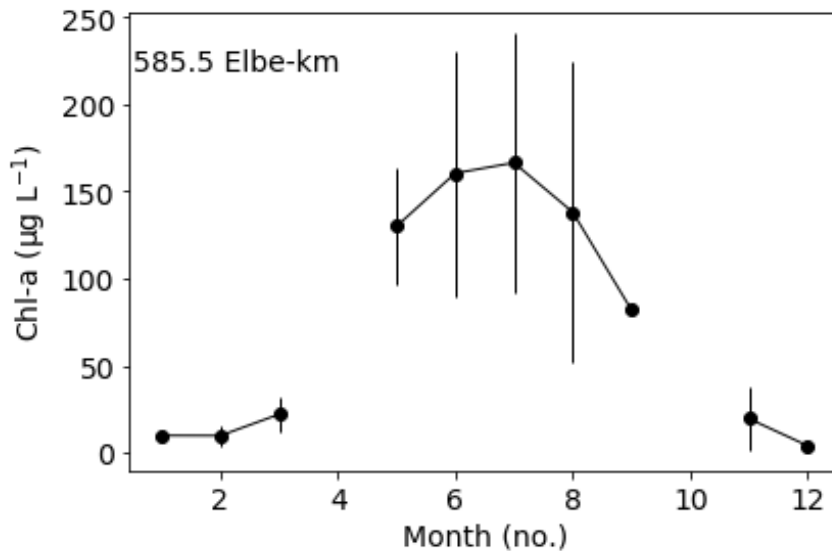

Figure S2. Monthly mean chlorophyll a (Chl-a) concentration at 585.5 Elbe-km (1997-2020). Error bar represents one standard deviation of the mean.

### Biological oxygen demand over 7 days (BOD<sub>7</sub>) in the Elbe Estuary

To obtain an overview of the ecosystem the biological oxygen demand over 7 days (BOD<sub>7</sub>) was plotted for each zone (Fig. S3).

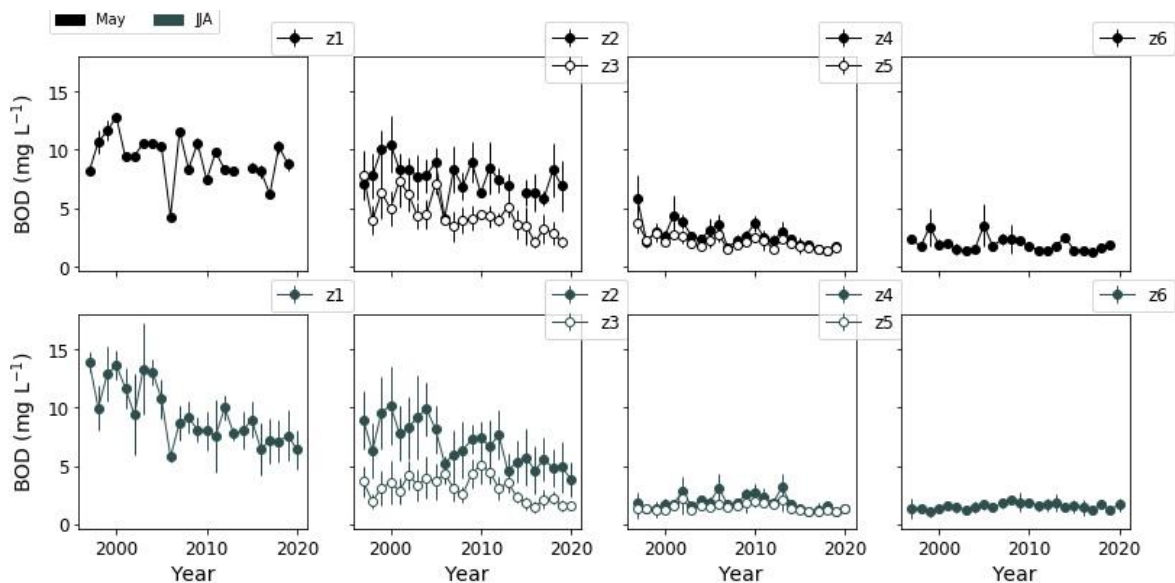

Figure S3. Mean biological oxygen demand over 7 days (BOD<sub>7</sub>) in late spring (May) and summer (June-August (JJA)) for each zone in the upper (z1-z3), mid (z4-z5) and lower (z6) estuary. Errors bars represent the standard deviation of the mean. In zone 1, the Pearson Correlation Coefficient was applied to BOD<sub>7</sub> over time, with a significant decrease in May ( $r=-0.39$ ,  $p < 0.10$ ) and summer JJA ( $r=-0.79$ ,  $p < 0.05$ ).

### Along-estuary DIC gain in mid-lower estuary and POC in upper estuary

The statistical difference between the POC concentrations in z1 and the along-estuary DIC gain in zones 4-7 was assessed. The Shapiro-Wilk test was used to determine normality of the dataset and the Bartlett's test was applied to test for equality of variances between the groups that were compared. All datasets (excl. z4 in May) presented a normal distribution and homogeneity of variance between the comparative groups (excl. JJA z4-z7), and therefore the independent t-test was applied to test the statistical difference between the means (Table S5-S6). In summer (JJA) in zones 4 to 7, the variances between along-estuary DIC gain in zones 4-7 and POC concentration in z1 were unequal and therefore the Welch's t-test was applied, which does not assume equal population variance. The Mann-Whitney U Test was applied to the datasets that presented non-normal distribution (z4 in May), and compared the medians of the data (Table S5 & S7).

Table S5. Tabulated p values for the independent t-test and Welch's t-test comparing the means (Table S6) and Mann-Whitney U test (#) comparing the medians (Table S7) for the POC concentration in zone 1 (z1) with the along-estuary DIC gain ( $\Delta$ DIC) in the mid-outer estuary in late spring (May) and summer (June-August, JJA) between 1997 and 2020. Data for May from 1997-2019.

|           | Month | $\Delta$ DIC |      |      |      |
|-----------|-------|--------------|------|------|------|
|           |       | z4           | z5   | z6   | z7   |
| POC in z1 | May   | (#) 0.00     | 0.16 | 0.07 | 0.21 |
|           | JJA   | 0.02         | 0.74 | 0.07 | 0.01 |

Table S6. The mean ( $\pm$  standard deviation of the average for each zone between 1997 and 2020) for the POC concentration in zone 1 (z1) and the along-estuary DIC gain ( $\Delta$ DIC) for late spring (May) and summer (June-August, JJA) between 1997 and 2020. Data for May from 1997-2019.

|     | POC ( $\mu\text{mol kg}^{-1}$ ) | $\Delta$ DIC ( $\mu\text{mol kg}^{-1}$ ) |               |               |               |
|-----|---------------------------------|------------------------------------------|---------------|---------------|---------------|
|     | z1                              | z4                                       | z5            | z6            | z7            |
| May | 377 $\pm$ 165                   | 158 $\pm$ 207                            | 286 $\pm$ 247 | 272 $\pm$ 209 | 296 $\pm$ 208 |
| JJA | 347 $\pm$ 94                    | 247 $\pm$ 171                            | 359 $\pm$ 155 | 425 $\pm$ 180 | 475 $\pm$ 205 |

Table S7. The median for the POC concentration in zone 1 (z1) and the along-estuary DIC gain ( $\Delta$ DIC) for late spring (May) and summer (June-August, JJA) between 1997 and 2020. Data for May from 1997-2019.

|     | POC ( $\mu\text{mol kg}^{-1}$ ) | $\Delta$ DIC ( $\mu\text{mol kg}^{-1}$ ) |     |     |     |
|-----|---------------------------------|------------------------------------------|-----|-----|-----|
|     | z1                              | z4                                       | z5  | z6  | z7  |
| May | 359                             | 106                                      | 251 | 236 | 309 |
| JJA | 351                             | 257                                      | 371 | 411 | 496 |

#### Mixing line plots of DIC against salinity in May to August

The DIC variability along the salinity gradient, with conservative mixing line between the river and North Sea end members, in May, June, July and August between 1997 and 2020 (Figs. S4-S7).

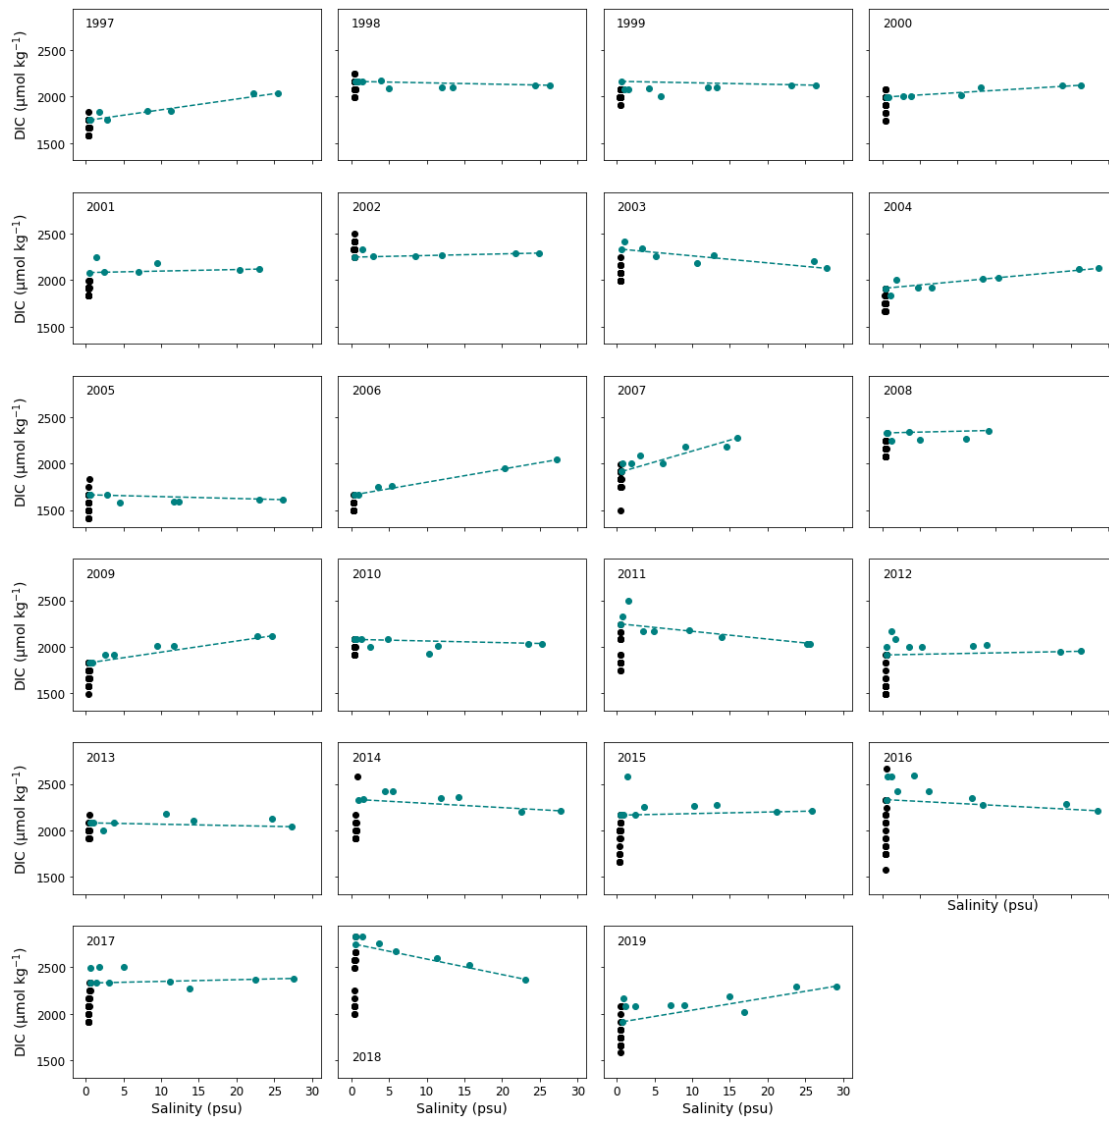

Figure S4. In May, DIC in the freshwater region (black dots) and DIC along the salinity gradient (green dots) with dashed line connecting the beginning of the salinity gradient and the saline end member from 1997 to 2019.

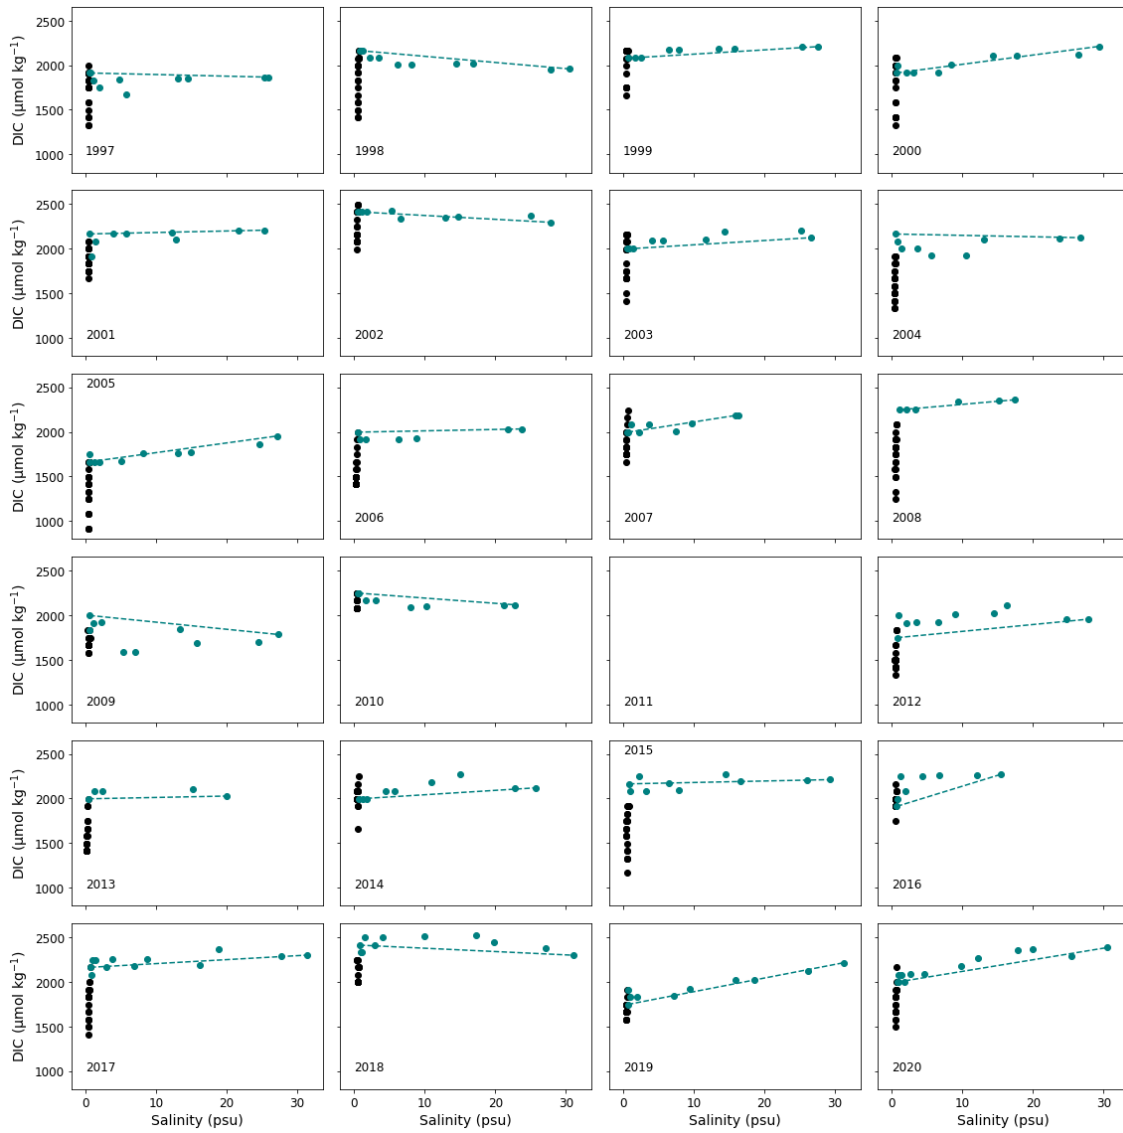

Figure S5. In June, DIC in the freshwater region (black dots) and DIC along the salinity gradient (green dots) with dashed line connecting the beginning of the salinity gradient and the saline end member from 1997 to 2020.

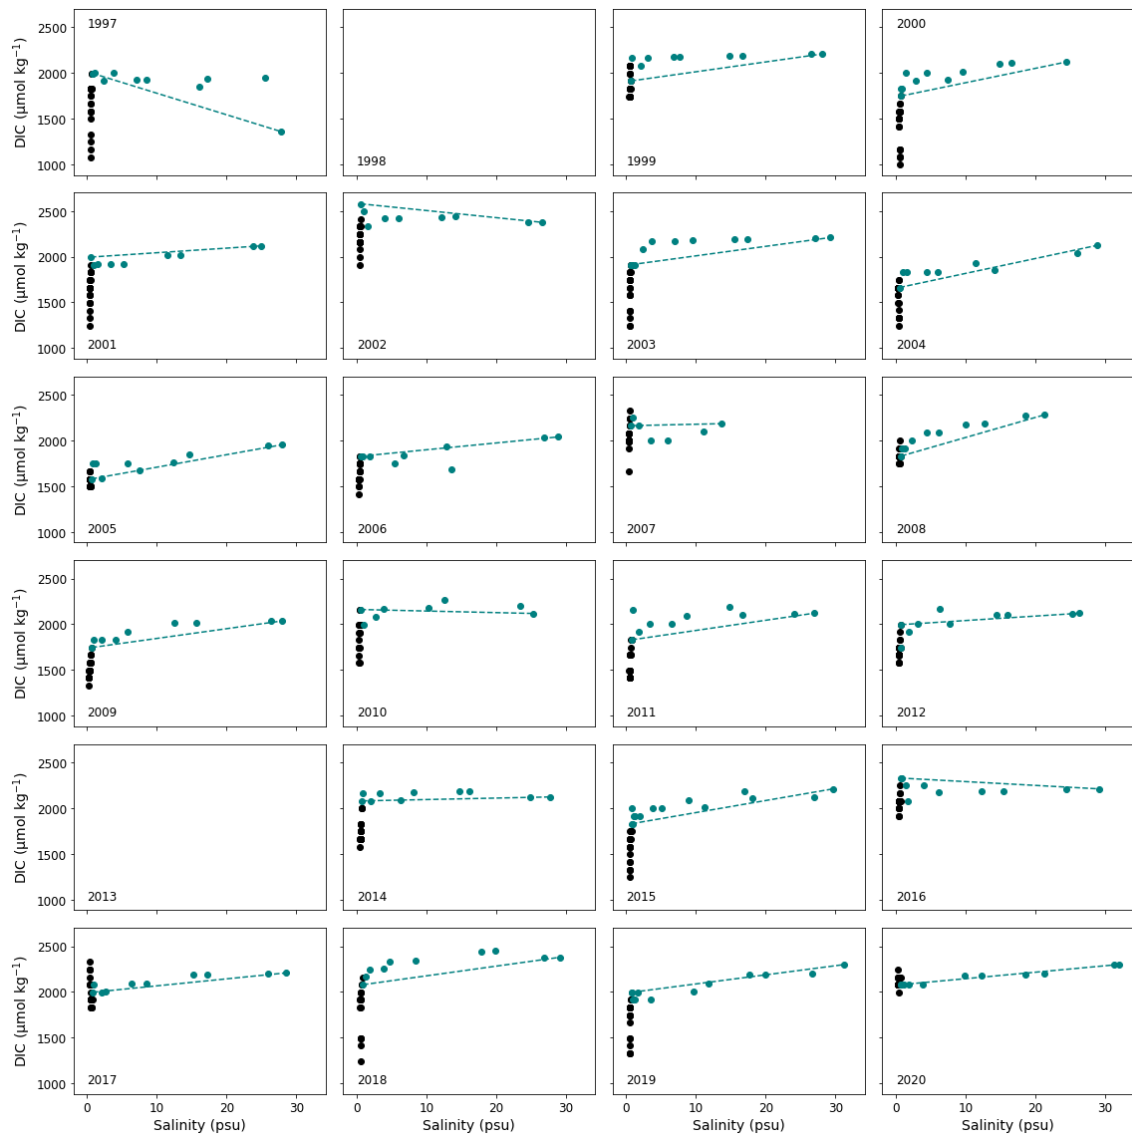

Figure S6. In July, DIC in the freshwater region (black dots) and DIC along the salinity gradient (green dots) with dashed line connecting the beginning of the salinity gradient and the saline end member from 1997 to 2020.



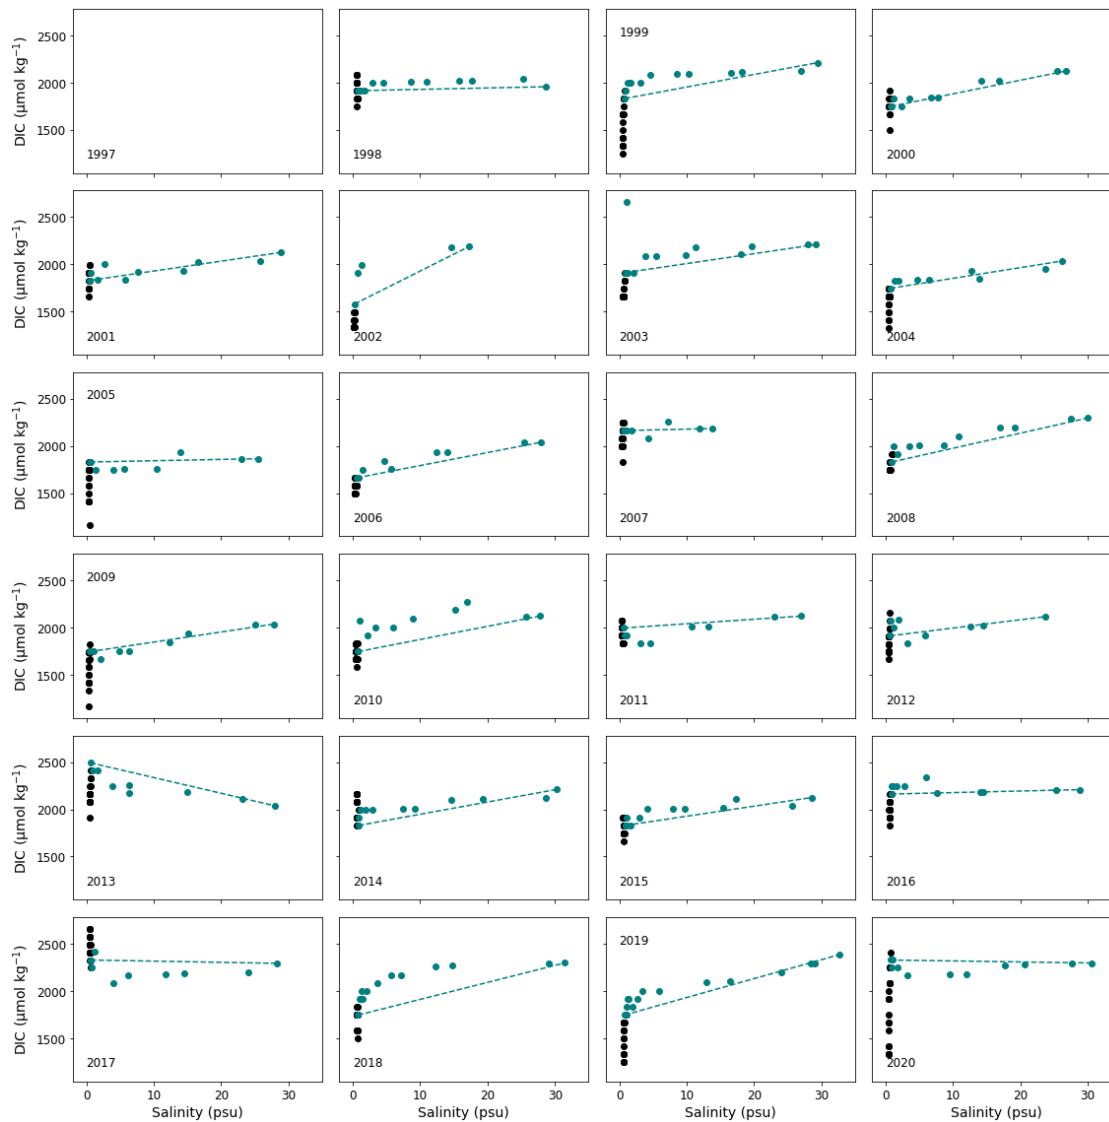

Figure S7. In August, DIC in the freshwater region (black dots) and DIC along the salinity gradient (green dots) with dashed line connecting the beginning of the salinity gradient and the saline end member from 1997 to 2020.

#### River discharge as a driver of DIC changes in the Elbe Estuary

The statistical difference between river discharge in 1960-2020 and in 2014-2020 was assessed using the Mann-Whitney U Test (Table S8), as both datasets presented a non-normal distribution from the Shapiro-Wilk test ( $p < 0.05$ ).

Table S8. The median for the long-term river discharge period (1960-2020) and the recent low river discharge period (2014-2020), compared using the Mann-Whitney-U-test with the p value.

| River discharge ( $\text{m}^3 \text{s}^{-1}$ ) |           | Mann-Whitney U test (p value) |
|------------------------------------------------|-----------|-------------------------------|
| 1960-2020                                      | 2014-2020 |                               |
| 555.0                                          | 406.0     | 0.00                          |

The statistical difference between the internal DIC load in the non-drought (1997-2013) and drought (2014-2020) period was assessed. The Shapiro-Wilk test was used to determine normality of the dataset and the Bartlett's test was applied to test for equality of variances between the groups that were compared. All datasets (excl. May z5 1997-2013 and Jun z4 2014-2020) presented a normal distribution and homogeneity of variance of the comparative groups, and therefore the independent t-test was applied to test the statistical difference between the means (Table S9-S10). The Mann-Whitney U Test was applied to the datasets that presented non-normal distribution (Table S9 & S11).

Table S9. Tabulated p values for the independent t-test comparing the means (Table S10) and the Mann-Whitney U Test (#) comparing the medians (Table S11) for the internal DIC load in monthly, May-August and summer

(June-August, JJA), comparing the normal river discharge period (1997-2013) and the recent low river discharge period (2014-2020). August 2002, August 2010 and June-July 2013 were excluded as flood months. Data for May from 1997-2019.

| Internal DIC load | May      | Jun      | Jul  | Aug  | May-Aug | JJA  |
|-------------------|----------|----------|------|------|---------|------|
| <b>z4</b>         | 0.00     | 0.02 (#) | 0.17 | 0.44 | 0.55    | 0.03 |
| <b>z5</b>         | 0.00 (#) | 0.12     | 0.03 | 0.30 | 0.23    | 0.01 |
| <b>z6</b>         | 0.03     | 0.38     | 0.04 | 0.13 | 0.12    | 0.01 |
| <b>z4-z6</b>      | 0.00     | 0.03     | 0.00 | 0.06 | 0.07    | 0.00 |

Table S10. Mean ( $\pm$  standard deviation of the average for each zone between 1997 and 2020) internal DIC load in the mid to lower (z4-z6) estuary in monthly, May-August and summer (June-August, JJA) during the normal river discharge period (1997-2013) and the recent low river discharge period (2014-2020) in Gmol C month<sup>-1</sup>. August 2002, August 2010 and June-July 2013 were excluded as flood months. Data for May from 1997-2019.

| Year range       | Internal DIC load | May            | Jun            | Jul            | Aug            | May-Aug        | JJA            |
|------------------|-------------------|----------------|----------------|----------------|----------------|----------------|----------------|
| <b>1997-2013</b> | <b>z4</b>         | 0.3 $\pm$ 0.17 | 0.5 $\pm$ 0.27 | 0.4 $\pm$ 0.31 | 0.3 $\pm$ 0.22 | 0.4 $\pm$ 0.26 | 0.4 $\pm$ 0.28 |
|                  | <b>z5</b>         | 0.6 $\pm$ 0.21 | 0.7 $\pm$ 0.32 | 0.7 $\pm$ 0.29 | 0.4 $\pm$ 0.21 | 0.6 $\pm$ 0.28 | 0.6 $\pm$ 0.31 |
|                  | <b>z6</b>         | 0.7 $\pm$ 0.24 | 0.8 $\pm$ 0.33 | 0.7 $\pm$ 0.32 | 0.5 $\pm$ 0.19 | 0.7 $\pm$ 0.29 | 0.7 $\pm$ 0.31 |
|                  | <b>z4-z6</b>      | 0.5 $\pm$ 0.27 | 0.7 $\pm$ 0.32 | 0.6 $\pm$ 0.33 | 0.4 $\pm$ 0.23 | 0.6 $\pm$ 0.31 | 0.6 $\pm$ 0.32 |
| <b>2014-2020</b> | <b>z4</b>         | 0.7 $\pm$ 0.16 | 0.3 $\pm$ 0.18 | 0.2 $\pm$ 0.24 | 0.2 $\pm$ 0.30 | 0.3 $\pm$ 0.28 | 0.3 $\pm$ 0.24 |
|                  | <b>z5</b>         | 1.0 $\pm$ 0.21 | 0.5 $\pm$ 0.21 | 0.4 $\pm$ 0.24 | 0.3 $\pm$ 0.32 | 0.5 $\pm$ 0.34 | 0.4 $\pm$ 0.26 |
|                  | <b>z6</b>         | 1.0 $\pm$ 0.18 | 0.7 $\pm$ 0.19 | 0.4 $\pm$ 0.22 | 0.4 $\pm$ 0.34 | 0.6 $\pm$ 0.33 | 0.5 $\pm$ 0.29 |
|                  | <b>z4-z6</b>      | 0.9 $\pm$ 0.22 | 0.5 $\pm$ 0.24 | 0.4 $\pm$ 0.24 | 0.3 $\pm$ 0.31 | 0.5 $\pm$ 0.33 | 0.4 $\pm$ 0.28 |

Table S11. The monthly median (in Gmol C month<sup>-1</sup>) internal DIC load in monthly, May-August and summer (June-August, JJA) during the normal river discharge period (1997-2013) and the recent low river discharge period (2014-2020). August 2002, August 2010 and June-July 2013 were excluded as flood months. Data for May from 1997-2019.

| Year range       | Internal DIC load | May | Jun | Jul | Aug | May-Aug | JJA |
|------------------|-------------------|-----|-----|-----|-----|---------|-----|
| <b>1997-2013</b> | <b>z4</b>         | 0.2 | 0.6 | 0.5 | 0.2 | 0.4     | 0.5 |
|                  | <b>z5</b>         | 0.6 | 0.7 | 0.6 | 0.3 | 0.6     | 0.6 |
|                  | <b>z6</b>         | 0.7 | 0.8 | 0.7 | 0.5 | 0.7     | 0.7 |
|                  | <b>z4-z6</b>      | 0.5 | 0.7 | 0.6 | 0.4 | 0.6     | 0.6 |
| <b>2014-2020</b> | <b>z4</b>         | 0.7 | 0.3 | 0.3 | 0.2 | 0.3     | 0.3 |
|                  | <b>z5</b>         | 1.1 | 0.5 | 0.4 | 0.4 | 0.5     | 0.4 |
|                  | <b>z6</b>         | 1.0 | 0.7 | 0.5 | 0.5 | 0.6     | 0.5 |
|                  | <b>z4-z6</b>      | 0.9 | 0.5 | 0.4 | 0.3 | 0.5     | 0.4 |

The statistical difference between the POC load in z1 and the internal DIC load in zones 4-6 in 1997-2020 was assessed. The Shapiro-Wilk test was used to determine normality of the dataset and the Bartlett's test was applied to test for equality of variances between the groups that were compared. The internal DIC load and the POC load in z1 in June and July z4, and August z4-z5, presented a normal distribution and homogeneity of variance between comparative datasets, and therefore the independent t-test was applied to test the statistical difference between the means (Table S12-S13). June and July z5-z6, and August z6, presented a normal distribution but the variances between comparative datasets were unequal and therefore the Welch's t-test was applied. The Mann-Whitney U Test was applied to comparative datasets in May as datasets presented non-normal distribution (POC z1 in May), which compared the medians of the data (Table S13 & S14).

Table S12. Mean ( $\pm$  standard deviation of the average for each zone between 1997 and 2020) POC load in zone 1 (z1) and internal DIC load in the mid to lower (z4-z6) estuary from 1997 to 2020 in Gmol C month<sup>-1</sup>. August 2002, August 2010 and June-July 2013 were excluded as flood months. Data for May from 1997-2019.

|                          |                    | May                               | Jun                               | Jul                               | Aug                               |
|--------------------------|--------------------|-----------------------------------|-----------------------------------|-----------------------------------|-----------------------------------|
|                          | <b>POC z1</b>      | 0.6 $\pm$ 0.29                    | 0.4 $\pm$ 0.17                    | 0.4 $\pm$ 0.19                    | 0.3 $\pm$ 0.16                    |
| <b>Internal DIC load</b> | <b>z4</b>          | 0.4 $\pm$ 0.24                    | 0.5 $\pm$ 0.26                    | 0.4 $\pm$ 0.30                    | 0.3 $\pm$ 0.25                    |
|                          | <b>z5</b>          | 0.7 $\pm$ 0.28                    | 0.7 $\pm$ 0.30                    | 0.6 $\pm$ 0.30                    | 0.4 $\pm$ 0.25                    |
|                          | <b>z6</b>          | 0.8 $\pm$ 0.25                    | 0.8 $\pm$ 0.30                    | 0.7 $\pm$ 0.32                    | 0.5 $\pm$ 0.26                    |
|                          | <b>Sum (z4-z6)</b> | <b>1.78 <math>\pm</math> 0.25</b> | <b>1.92 <math>\pm</math> 0.28</b> | <b>1.60 <math>\pm</math> 0.30</b> | <b>1.10 <math>\pm</math> 0.25</b> |

Table S13. Tabulated p values for the independent t-test and Welch's t-test comparing the means (Table S11) and the Mann-Whitney U Test (#) comparing the medians (Table S13) for the internal DIC load in the mid-lower estuary with the POC load in zone 1, in May-August between 1997 and 2020 (in May to 2019).

|                      | Month         | Internal DIC load |          |          |
|----------------------|---------------|-------------------|----------|----------|
|                      |               | z4                | z5       | z6       |
| <b>POC load (z1)</b> | <b>May</b>    | 0.00 (#)          | 0.14 (#) | 0.00 (#) |
|                      | <b>June</b>   | 0.26              | 0.00     | 0.00     |
|                      | <b>July</b>   | 0.61              | 0.02     | 0.00     |
|                      | <b>August</b> | 0.26              | 0.55     | 0.03     |

Table S14. Median POC load in zone 1 (z1) and internal DIC load in the mid to lower (z4-z6) estuary in Gmol C month<sup>-1</sup> between 1997 and 2020 (in May to 2019). August 2002, August 2010 and June-July 2013 were excluded as flood months.

|                          |               | May | Jun | Jul | Aug |
|--------------------------|---------------|-----|-----|-----|-----|
|                          | <b>POC z1</b> | 0.6 | 0.4 | 0.4 | 0.3 |
| <b>Internal DIC load</b> | <b>z4</b>     | 0.3 | 0.6 | 0.4 | 0.2 |
|                          | <b>z5</b>     | 0.6 | 0.6 | 0.6 | 0.3 |
|                          | <b>z6</b>     | 0.8 | 0.8 | 0.7 | 0.5 |

### Recent DIC in Elbe Estuary

An example showing higher DIC concentrations in the upper estuary compared to mid estuary (July-August 2017, Fig. S8), potentially indicating DIC production in the upper estuary.

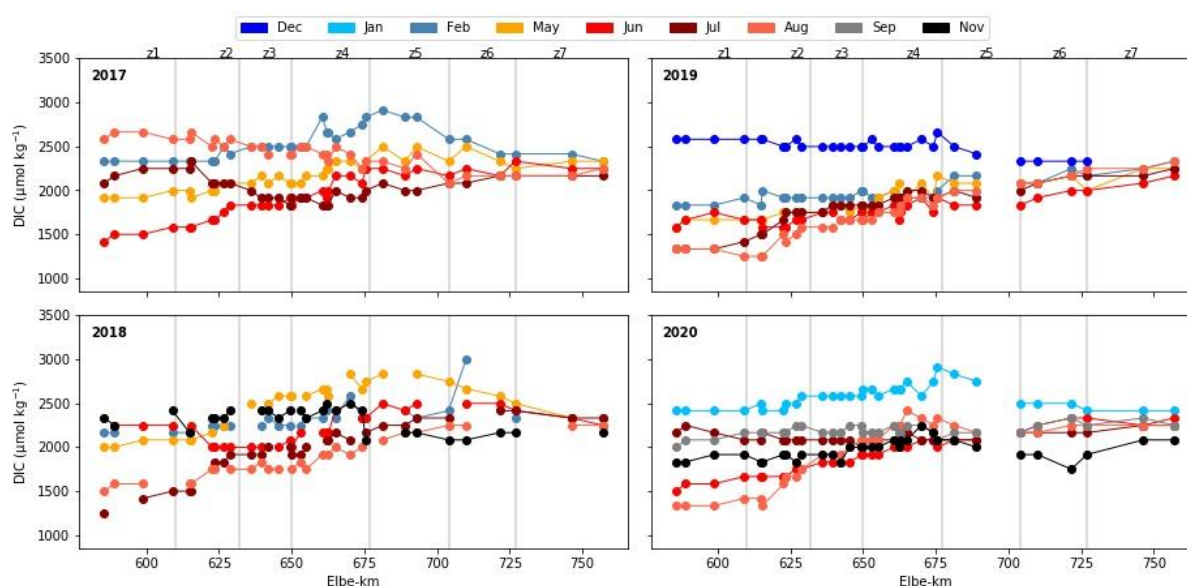

Figure S8. DIC along the Elbe Estuary in 2017-2020. Vertical lines indicate the zonation of the Elbe Estuary from the TIDE project shown in Fig. 1a (Geerts et al., 2012).

Annual inorganic carbon export estimates

Table S15. Mean ( $\pm$  standard deviation, std) and median for the air-water CO<sub>2</sub> flux estimate and the DIC export in the Elbe Estuary in the non-drought (1997-2013) and the drought (2014-2020) period in Gmol C yr<sup>-1</sup>. Tabulated p values for the independent t-test comparing the means (\*) and the Mann-Whitney U Test (#) comparing the medians for air-water CO<sub>2</sub> flux estimate and DIC export in the non-drought (1997-2013) and the drought (2014-2020) period. Flood years of 2002, 2010 and 2013 were included (incl.) and excluded (excl.) from statistical tests.

|                                                    | Non-drought (1997-2013) |        | Drought (2014-2020) |        | p value |
|----------------------------------------------------|-------------------------|--------|---------------------|--------|---------|
|                                                    | Mean ( $\pm$ std)       | Median | Mean ( $\pm$ std)   | Median |         |
| DIC export (incl. flood years)                     | 55 $\pm$ 14.0           | 50     | 38 $\pm$ 5.4        | 39     | 0.00#   |
| DIC export (excl. flood years)                     | 50 $\pm$ 6.4            | 49     | 38 $\pm$ 5.4        | 39     | 0.00*   |
| Air-water CO <sub>2</sub> flux (incl. flood years) | 6 $\pm$ 1.5             | 6      | 6 $\pm$ 1.9         | 5      | 0.22#   |
| Air-water CO <sub>2</sub> flux (excl. flood years) | 6 $\pm$ 1.6             | 6      | 6 $\pm$ 1.9         | 5      | 0.22#   |

POC as percent of SPM

POC in % of SPM represents the content of POC available for biological processing (Sullivan et al. 2001; Abril et al. 2002), and therefore the parameter can describe the mineralisation and production of POC (Fig. S9).

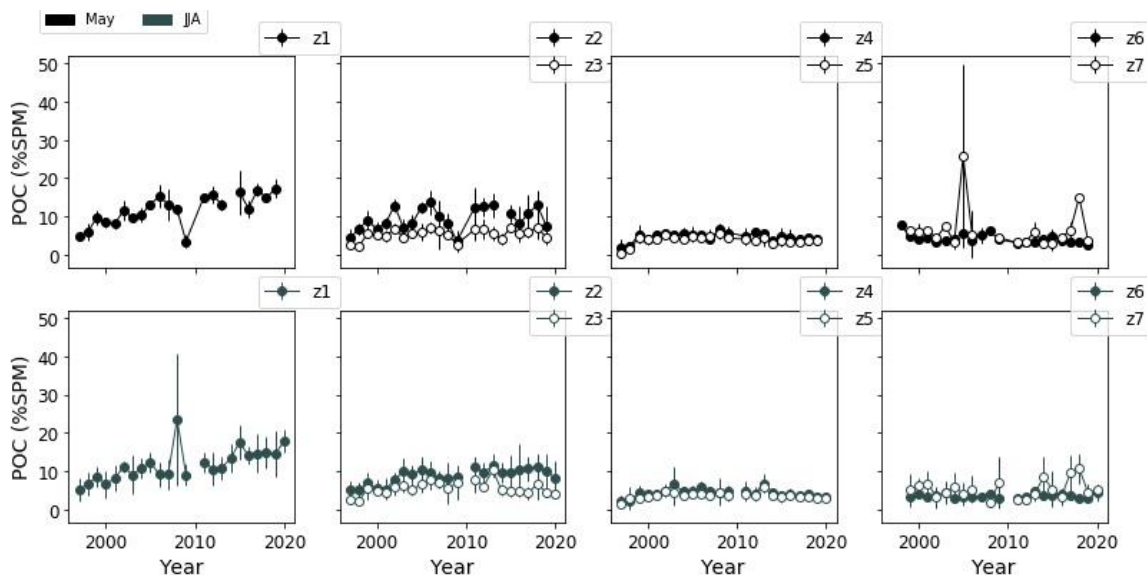

Figure S9. Mean POC as percent (%) of suspended particulate matter (SPM) in late spring (May) and summer (June-August (JJA)) for each zone in the upper (z1-z3), mid (z4-z5) and lower-outer (z6-z7) estuary. Errors bars represent the standard deviation of the mean. POC as % of SPM calculations based on POC and SPM samples collected on the FGG Elbe helicopter campaign (Table S1).

### Water residence time in Elbe Estuary as a function of river discharge

Table S16. Typical water residence time in the six zones in the inner Elbe estuary as a function of three different river discharge amounts (Q) (Bergemann et al., 1996).

| Region        | Zone | Elbe-km   | Residence time                         |                                        |                                         |
|---------------|------|-----------|----------------------------------------|----------------------------------------|-----------------------------------------|
|               |      |           | Q = 250 m <sup>3</sup> s <sup>-1</sup> | Q = 700 m <sup>3</sup> s <sup>-1</sup> | Q = 1200 m <sup>3</sup> s <sup>-1</sup> |
| Upper estuary | 1    | 586 – 610 | < 2                                    | < 1                                    | < 1                                     |
|               | 2    | 610 – 632 | 3-4                                    | 2                                      | 1                                       |
|               | 3    | 632 – 650 | 7                                      | 2-3                                    | 1-2                                     |
| Mid- estuary  | 4    | 650 – 677 | 17                                     | 5-6                                    | 3-4                                     |
|               | 5    | 677 – 704 | 24                                     | 9                                      | 6                                       |
| Lower estuary | 6    | 704 – 727 | 30                                     | 11                                     | 6                                       |

### Mixing line plots of DOC against salinity in May to August

The DOC variability along the salinity gradient, with conservative mixing line between the river and North Sea end members, in May, June, July and August between 1997 and 2020 (Figs. S10-S13).

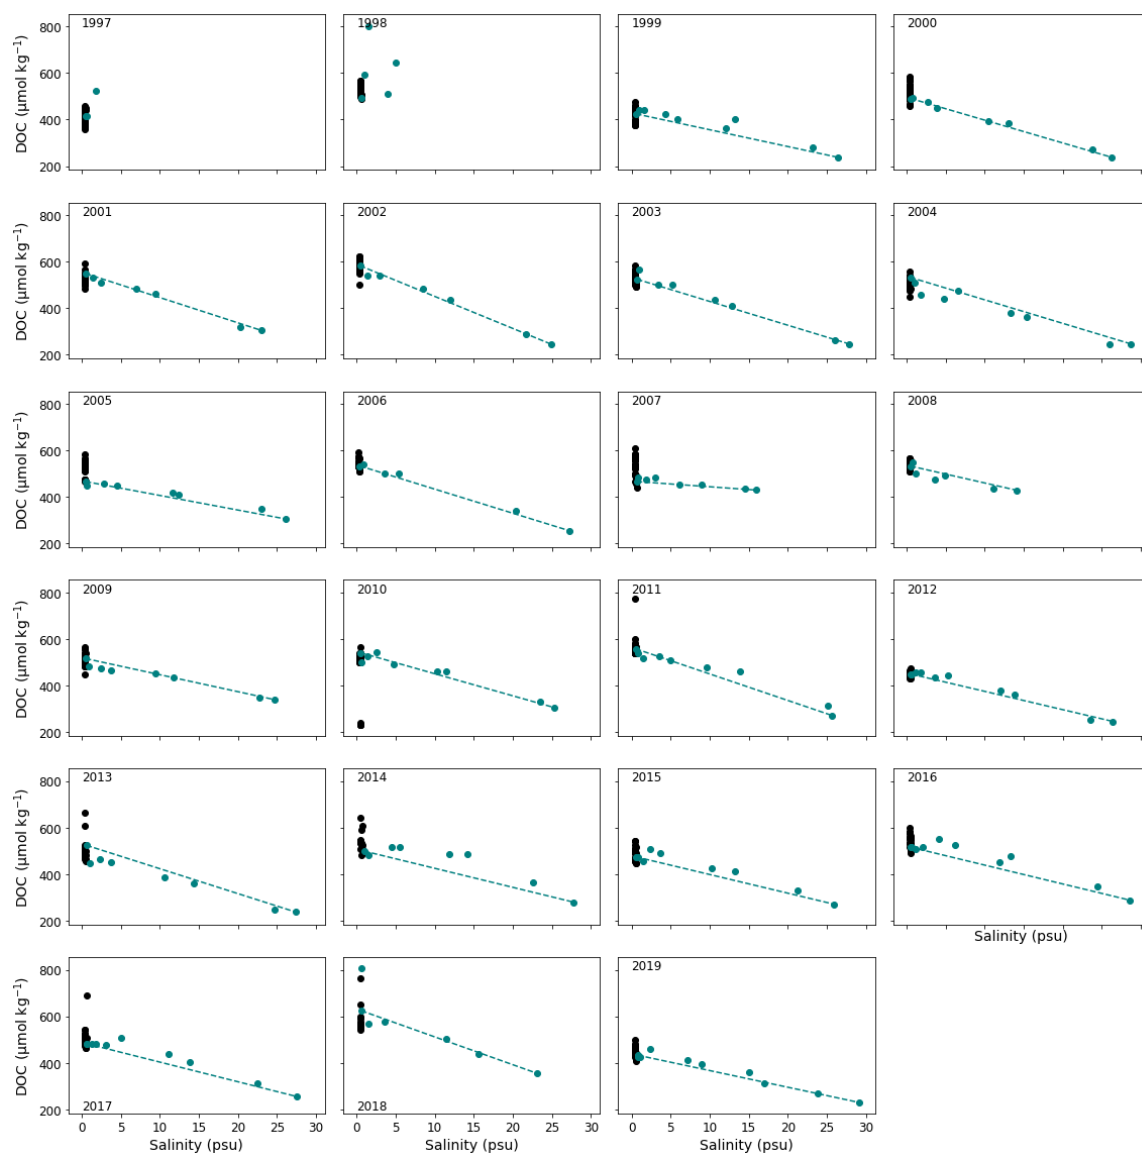

Figure S10. In May, DOC in the freshwater region (black dots) and DIC along the salinity gradient (green dots) with dashed line connecting the beginning of the salinity gradient and the saline end member from 1997 to 2019.

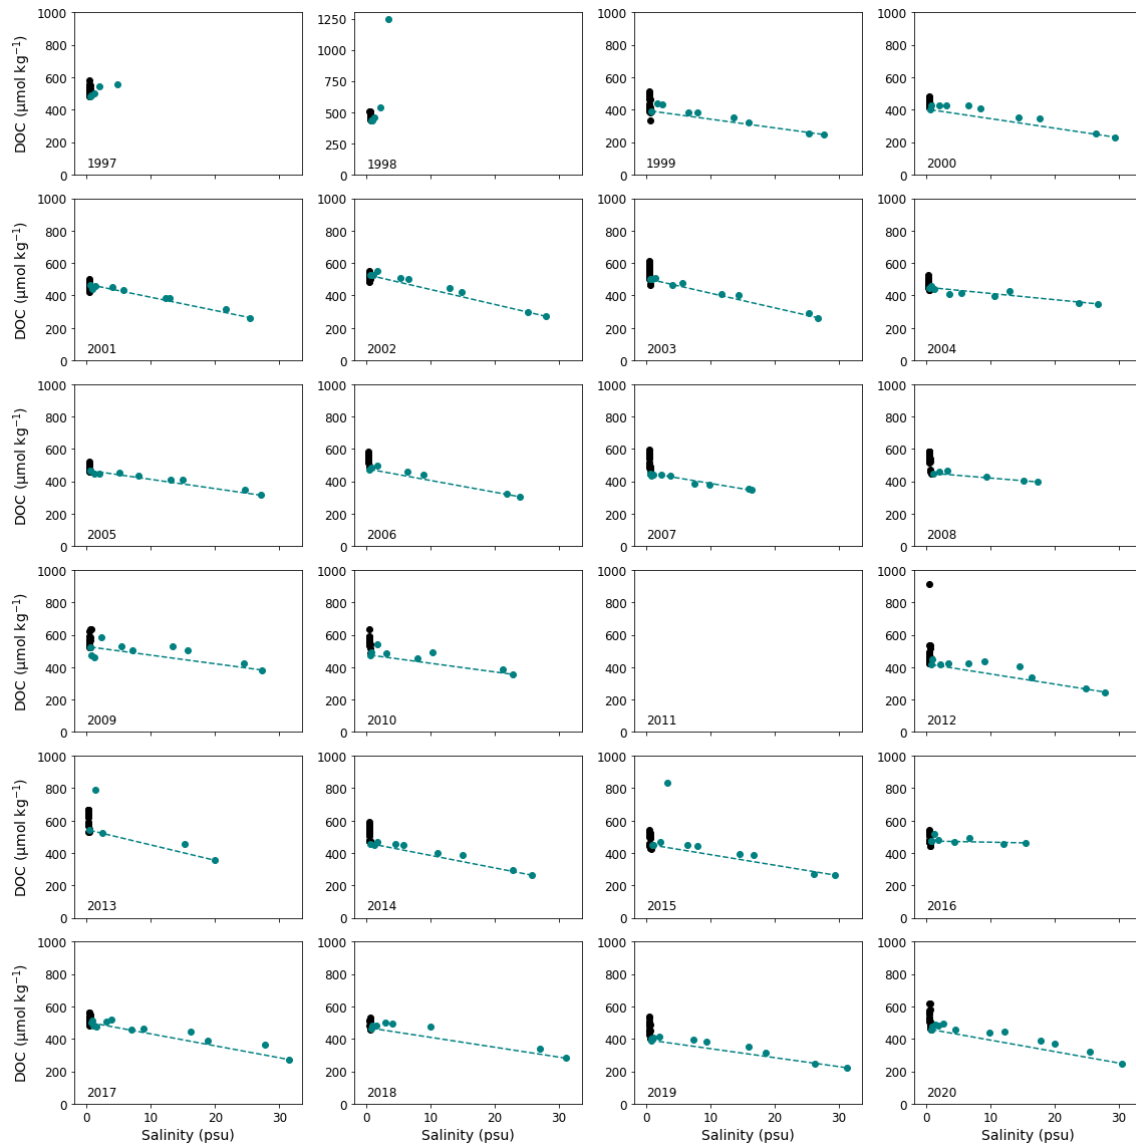

Figure S11. In June, DOC in the freshwater region (black dots) and DIC along the salinity gradient (green dots) with dashed line connecting the beginning of the salinity gradient and the saline end member from 1997 to 2020.

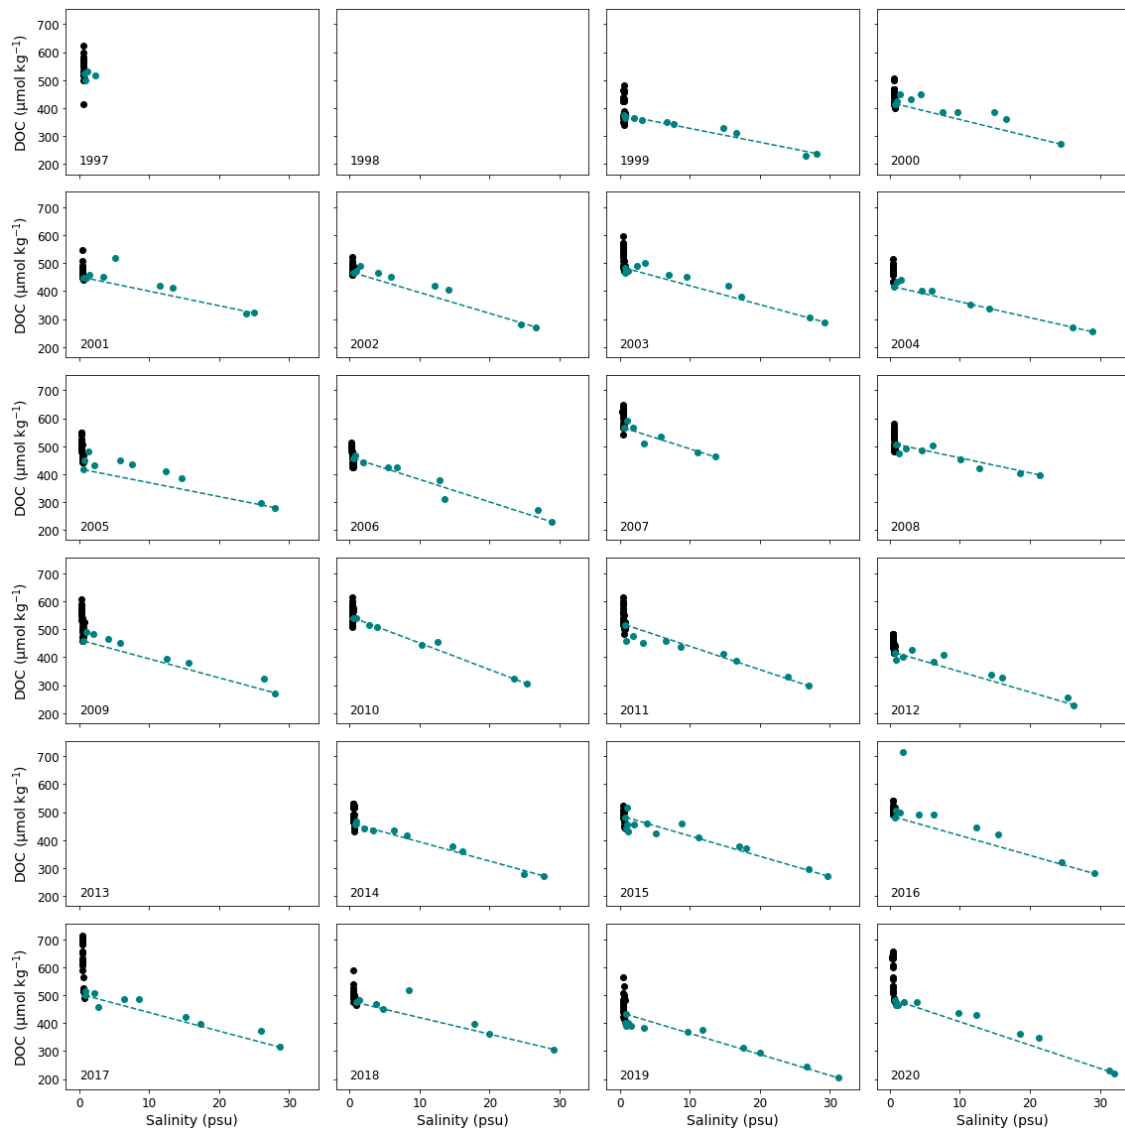

Figure S12. In July, DOC in the freshwater region (black dots) and DIC along the salinity gradient (green dots) with dashed line connecting the beginning of the salinity gradient and the saline end member from 1997 to 2020.



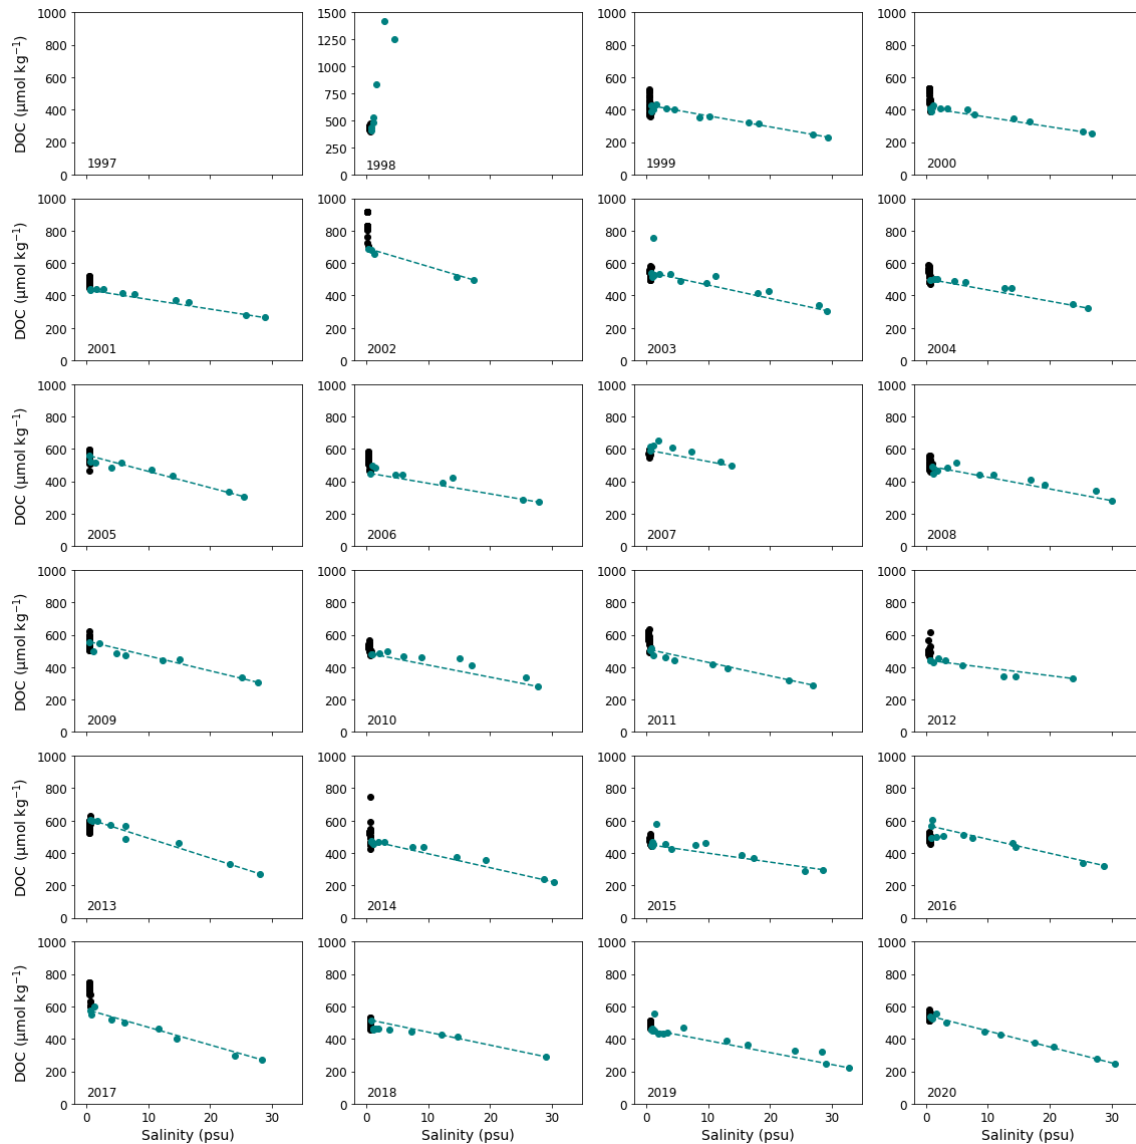

Figure S13. In August, DOC in the freshwater region (black dots) and DIC along the salinity gradient (green dots) with dashed line connecting the beginning of the salinity gradient and the saline end member from 1997 to 2020.

## References

- Abril, G., Nogueira, M., Etcheber, H., Cabeçadas, G., Lemaire, E., & Brogueira, M. J. (2002). Behaviour of organic carbon in nine contrasting European estuaries. *Estuarine, coastal and shelf science*, *54*(2), 241-262.
- ARGE (2000) Stoffkonzentrationen in mittels Hubschrauber entnommenen Elbewasserproben (1979–1998). *Arbeitsgemeinschaft zur Reinhaltung der Elbe (2000) (Report)*
- Amann, T., Weiss, A., & Hartmann, J. (2015). Inorganic carbon fluxes in the inner Elbe estuary, Germany. *Estuaries and Coasts*, *38*, 192-210.
- Bergemann, M., Blöcker, G., Harms, H., Kerner, M., Meyer-Nehls, R., Petersen, W., & Schroeder, F. (1996). Der Sauerstoffhaushalt der Tideelbe. *Die Küste*, *58*, (58), 199-261.
- Geerts, L., Cox, T. J. S., Maris, T., Wolfstein, K., Meire, P., & Soetaert, K. (2017). Substrate origin and morphology differentially determine oxygen dynamics in two major European estuaries, the Elbe and the Schelde. *Estuarine, Coastal and Shelf Science*, *191*, 157-170.

Norbisrath, M., Pätsch, J., Dähnke, K., Sanders, T., Schulz, G., van Beusekom, J. E., & Thomas, H. (2022). Metabolic alkalinity release from large port facilities (Hamburg, Germany) and impact on coastal carbon storage. *Biogeosciences*, *19*(22), 5151-5165.

Sullivan, B. E., Prahl, F. G., Small, L. F., & Covert, P. A. (2001). Seasonality of phytoplankton production in the Columbia River: A natural or anthropogenic pattern?. *Geochimica et Cosmochimica Acta*, *65*(7), 1125-1139.
